# Supplementary material for: A sustainable biomass adhesive based on a biomimetic “sea-island” structure, featuring boiling water resistance and antibacterial properties
Source: Royal Society of Chemistry journal article supplement (doi:10.1039/d5gc05000f), 2025-12-29
Supplement: d5gc05000f1.pdf [file d5gc05000f1.pdf]

**A sustainable biomass adhesive based on the biomimetic “sea-island” structure, featuring boiling water resistance and antibacterial properties**

*Ming Wei,<sup>a</sup> Yijun Zong,<sup>c</sup> Yuyan Jiang,<sup>a</sup> Desen Meng,<sup>c</sup> Liangxian Liu,<sup>a</sup> Shaoliang Xiao<sup>\*a,b</sup> and Jian Li<sup>\*a,b</sup>*

<sup>a</sup>Key Laboratory of Bio-based Material Science & Technology (Ministry of Education),  
Northeast Forestry University, Harbin, P.R. China

<sup>b</sup> Engineering Research Center of Advanced Wooden Materials (Ministry of Education), Northeast Forestry University, Harbin, P.R. China

<sup>c</sup> Shandong Xingang Enterprise Group Co., Ltd, Shandong, P.R. China

\* Email: [shaoliangxiao@nefu.edu.cn](mailto:shaoliangxiao@nefu.edu.cn)

\* Email: [nefulijian@163.com](mailto:nefulijian@163.com)

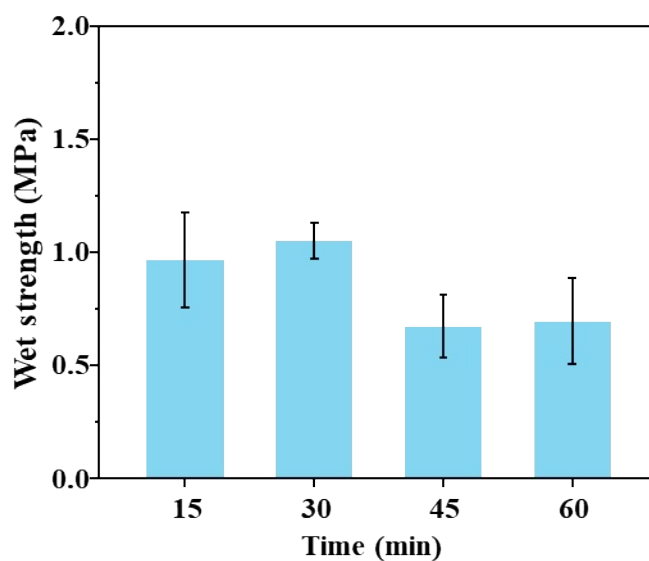

**Fig. S1.** The wet strength in boiling water of CS-5%RAE adhesives with different reaction time.

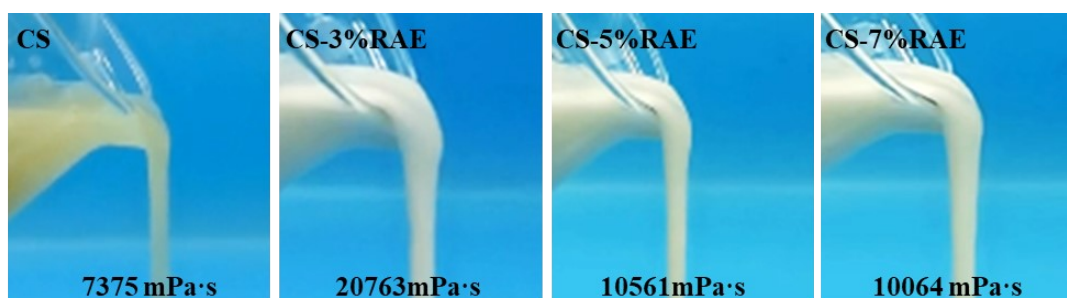

**Fig. S2.** The viscosity of CS-based adhesives with different RAE addition amounts.

**Table. S1.** The detailed components of CS and CS-RAE adhesive.

| Sample   | CS powder (g) | Acetic acid (g) | RAE (g) | Deionized water (mL) |
|----------|---------------|-----------------|---------|----------------------|
| CS       | 5             | 1               | 0       | 94                   |
| CS-3%RAE | 5             | 1               | 3       | 91                   |
| CS-5%RAE | 5             | 1               | 5       | 89                   |
| CS-7%RAE | 5             | 1               | 7       | 87                   |

**Table. S2.** The detailed data of TG, DTG, and DSC curves of chitosan adhesives with different contents of RAE.

| Sample   | TG                      |                          |                             | DTG   | DSC                    |                        |                         |
|----------|-------------------------|--------------------------|-----------------------------|-------|------------------------|------------------------|-------------------------|
|          | T <sub>5%</sub><br>(°C) | T <sub>50%</sub><br>(°C) | Residue<br>at 500<br>°C (%) |       | T <sub>g</sub><br>(°C) | T <sub>m</sub><br>(°C) | T <sub>cc</sub><br>(°C) |
| CS       | 116.5                   | 341.7                    | 38.56                       | 290.2 | 125.7                  | 306.8                  | /                       |
| CS-3%RAE | 113.8                   | 361.2                    | 35.28                       | 294.4 | 116.6                  | 328.6                  | 447.8                   |
| CS-5%RAE | 110.5                   | 358.9                    | 35.83                       | 295.4 | 112.7                  | 324.3                  | 447.5                   |
| CS-7%RAE | 113.6                   | 366.7                    | 35.90                       | 290.4 | 110.3                  | 327.1                  | 443.7                   |

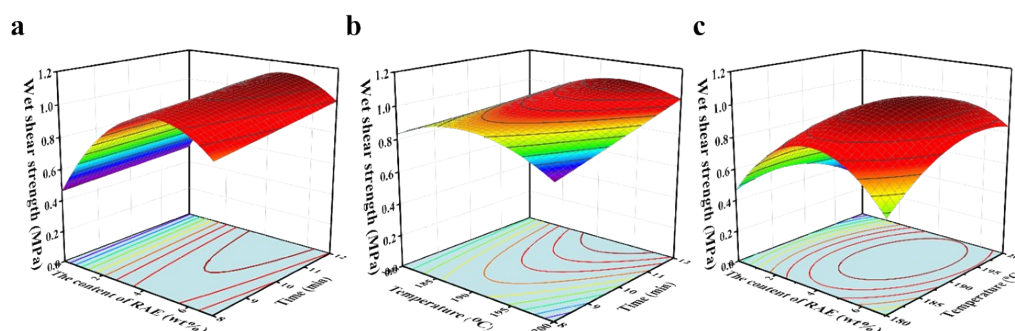

**Fig. S3.** The effects of hot-pressing time, temperature, and the content of RAE on wet bonding strength in boiling water were investigated by using the response surface test method. The influence of (a) hot-pressing time and the content of RAE, (b) hot-pressing time and hot-pressing temperature, and (c) the content of RAE and hot-pressing temperature on bonding strength.

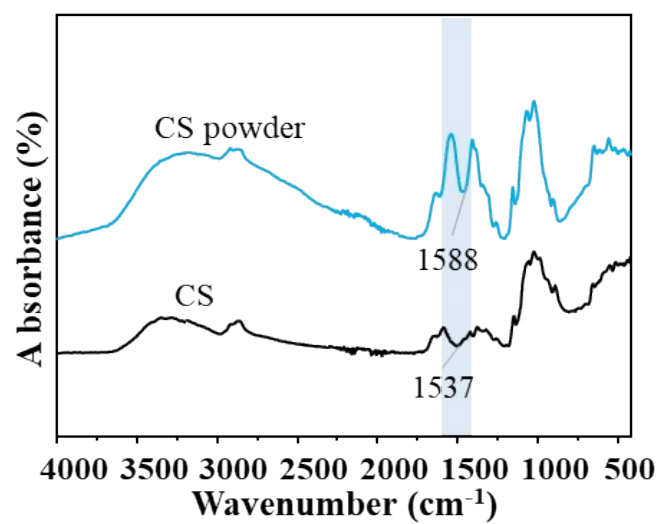

Fig. S4. FTIR spectra of CS powder and CS.

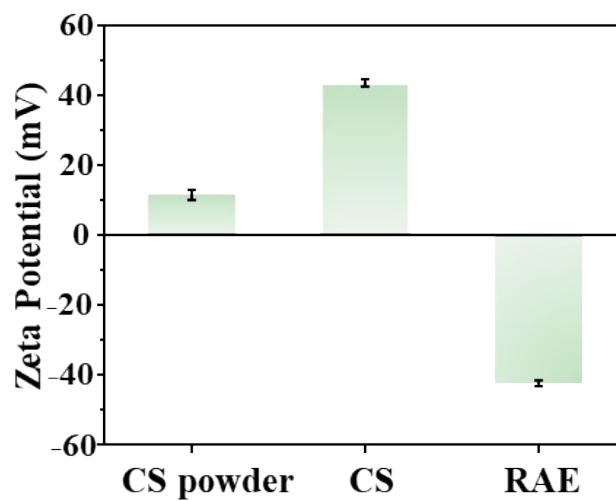

Fig. S5. The Zeta potential of CS powder, CS and RAE.

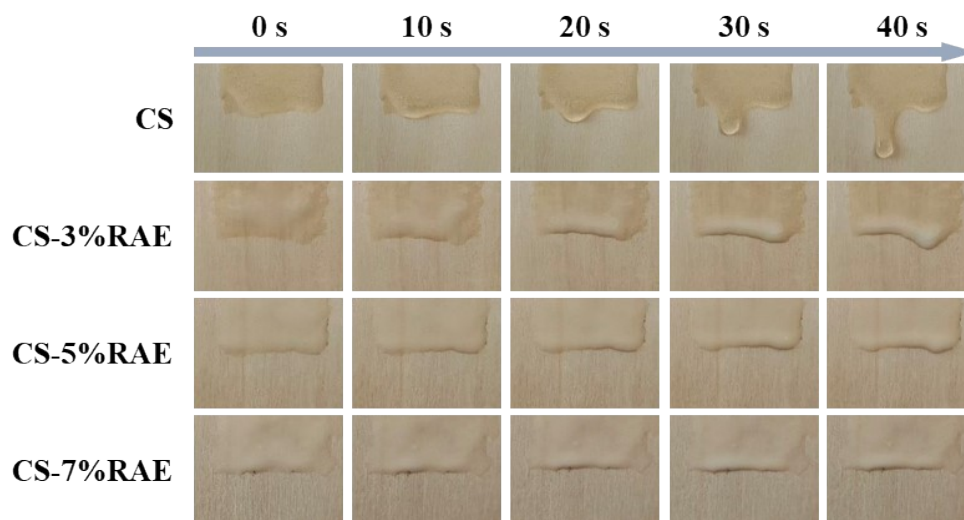

**Fig. S6.** The coating performance of CS, CS-3%RAE, CS-5%RAE, and CS-7%RAE, respectively.

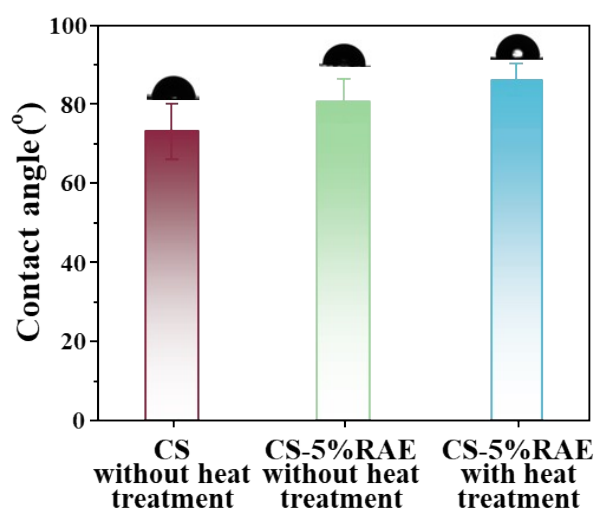

**Fig. S7.** The contact angle of (a) CS adhesive film without heat treatment, (b) CS-5%RAE adhesive film without heat treatment and (c) CS-5%RAE adhesive film with heat treatment, respectively.

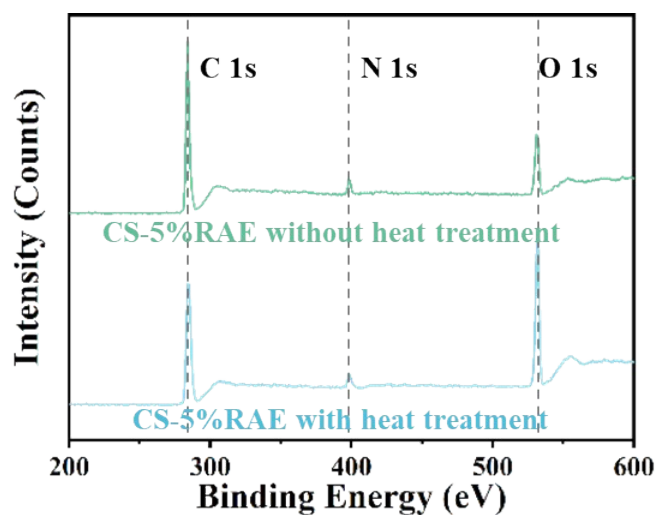

**Fig. S8.** The XPS survey spectra of CS-5%RAE without heat treatment and CS-5%RAE with heat treatment.

**Table. S3.** The detailed data of high- resolution XPS C1s spectra of CS, CS-5%RAE without heat treatment, and CS-5%RAE with heat treatment, respectively.

| Sample                          | 284.8 eV           | 286.4 eV   | 288.1 eV   |
|---------------------------------|--------------------|------------|------------|
| CS                              | C-C/C-H:49.52%     | C-N:39.01% | C-O:11.47% |
| CS-5%RAE without heat treatment | C-C/C=C/C-H:70.61% | C-N:24.23% | C-O:5.16%  |
| CS-5%RAE with heat treatment    | C-C/C=C/C-H:42.49% | C-N:46.35% | C-O:11.16% |

**Table. S4.** Results of the multiplication of the signs of each cross-peak in 2D COS synchronous and asynchronous spectra of CS-RAE.

| 1148                           | -    | +    |      |
|--------------------------------|------|------|------|
| 1730                           | -    |      | -    |
| 3380                           |      | +    | +    |
| Wavenumber (cm <sup>-1</sup> ) | 3380 | 1730 | 1148 |

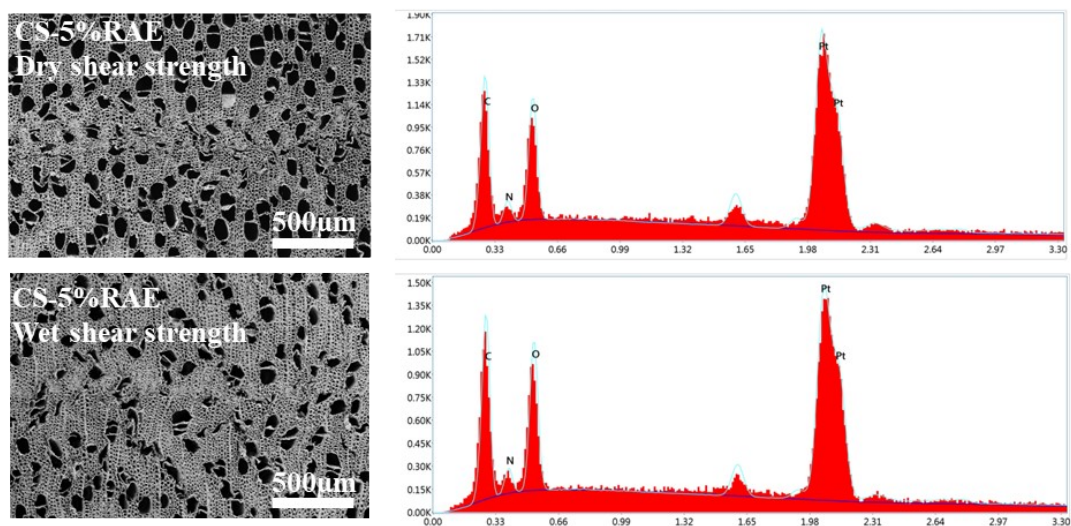

**Fig. S9.** SEM and EDS of the cross-sections of dry glued laminated timber and wet glued laminated timber immersed in boiling water.

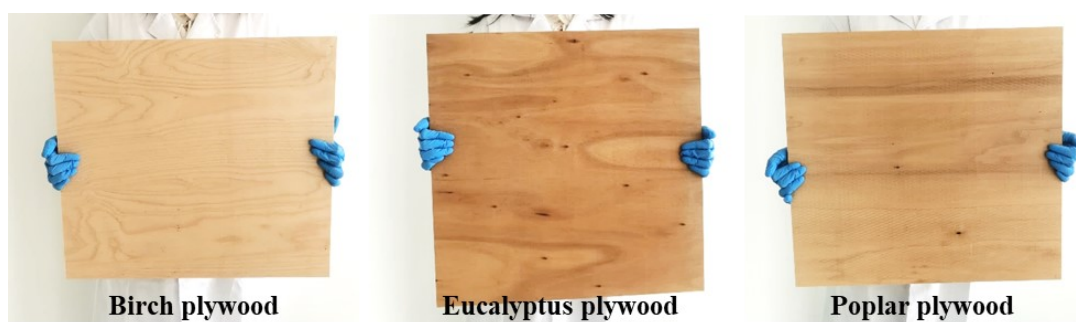

**Fig. S10.** The appearance diagrams of CS-RAE respectively applied to birch, eucalyptus and poplar plywood.
